# Supplementary material for: Effects of Wet and Dry Treatments on Surface Functional Groups and Mechanical Properties of Flax Fiber Composites
Source: MDPI journal article supplement (doi:10.3390/coatings13061036), 2023-06-02
Supplement: s1 [file s1]

## Supporting information

Samples were injected (1  $\mu$ L) on a GCMS-QP2010 (Shimadzu) via a split injector with 10:1 split ratio at 250°C with helium gas carrier on a HP-5ms, 30 m, 0.25 mm i.d., 0.25  $\mu$ m film column (Agilent Technologies). Detailed GC and MS parameters are listed in Supporting Information. Identification of compound was based on matching with NIST mass spectral library.

**Table S1.** GC-MS parameters

|                            |                                                   |
|----------------------------|---------------------------------------------------|
| Column                     | HP-5ms, 30 m, 0.25 mm i.d., 0.25 $\mu$ m film     |
| Injection volume           | 1 $\mu$ L                                         |
| Split ratio                | 10:1                                              |
| Carrier                    | He                                                |
| Linear velocity            | 36.3 cm·sec <sup>-1</sup>                         |
| Injector temperature       | 250°C                                             |
| Initial column temperature | 150 °C (held for 10 min)                          |
| Heating rate of column     | 10°C·min <sup>-1</sup> to 300°C (held for 10 min) |
| Scan range                 | 20-560 m/z                                        |
| Ionization mode            | EI                                                |
| Solvent cut time           | 3 minutes                                         |
| Ion Source temperature     | 230°C                                             |
| Interface temperature      | 290°C                                             |
