# Supplementary material for: Effects of Wet and Dry Treatments on Surface Functional Groups and Mechanical Properties of Flax Fiber Composites
Source: MDPI journal article supplement (doi:10.3390/coatings13061036), 2023-06-02
Supplement: s1 [file s1]

Archive with 1 entries (1 files):
- coatings-2392779-supplementary.pdf
